# Supplementary material for: Assembly of galvinoxyl doped in polymer–fullerene photovoltaic blends
Source: Royal Society of Chemistry journal article supplement (doi:10.1039/d3cp02513f), 2023-01-01
Supplement: d3cp02513f1.pdf [file d3cp02513f1.pdf]

## Supporting Information

# Assembly of Galvinoxyl Doped in Polymer-Fullerene Photovoltaic Blends

Mikhail N. Uvarov,<sup>a</sup> Leonid V. Kulik,<sup>a</sup> Sergei A. Dzuba<sup>a,b</sup>

<sup>a</sup> Voevodsky Institute of Chemical Kinetics and Combustion, RAS, Novosibirsk 630090, Russian Federation

<sup>b</sup> Department of Physics, Novosibirsk State University, 630090 Novosibirsk, Russian Federation

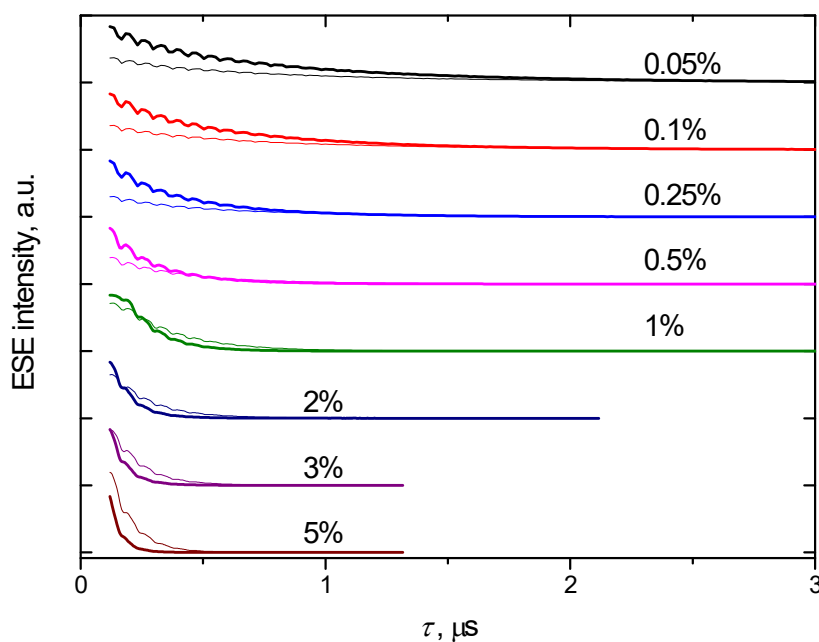

**Figure S1.** Original two-pulse ESE time traces for **Gx** of different weight concentrations in glassy toluene. Thick lines: the ESE signal for the pulse sequence  $\pi/2 - \tau - \pi - E(\tau)$ , thin lines: the ESE signal for the pulse sequence  $\pi/2 - \tau - 0.38\pi - E'(\tau)$ ; the same gain is used for each pair of signals  $E(\tau)$  and  $E'(\tau)$ . For convenience of presentation, data for different concentrations are vertically shifted.

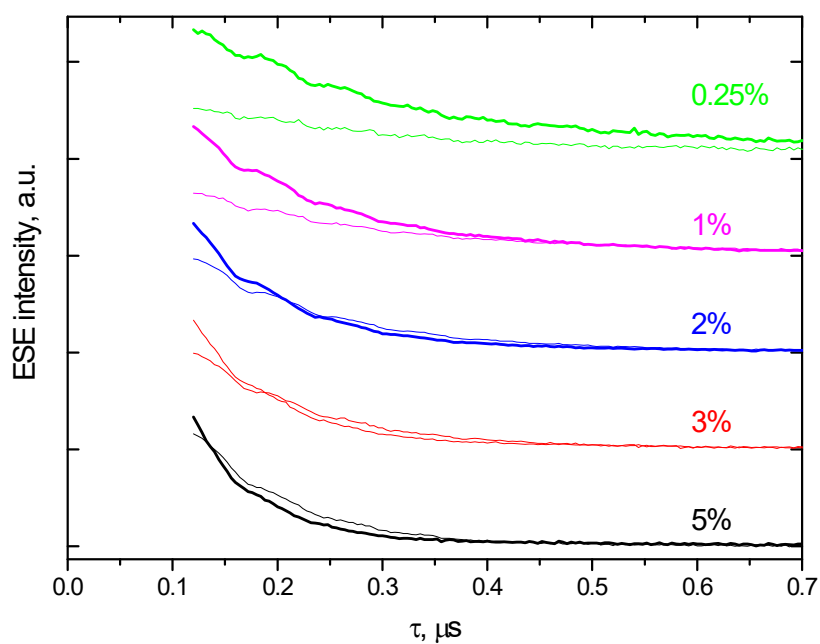

**Figure S2.** Original two-pulse ESE time traces for **Gx** of different weight concentrations in composite **PCDTBT:PCBM**. Thick lines: the ESE signal for the pulse sequence  $\pi/2 - \tau - \pi - E(\tau)$ , thin lines: the ESE signal for the pulse sequence  $\pi/2 - \tau - 0.38\pi - E'(\tau)$ ; the same gain is used for each pair of signals  $E(\tau)$  and  $E'(\tau)$ . For convenience of presentation, data for different concentrations are vertically shifted.
